# Supplementary material
Source: publisher figshare collection journal article supplement (https://gsajournals.figshare.com/ndownloader/files/24136097)
Supplement: Supplementary file 1 [file 24136097]

## Sheet: README
Table S1. Genes identified in the primary screen.
README
Tab: 196 primary
Positives from primary screening of Ahringer and Vidal libraries were distributed onto 6 different 96-well plates and rescreened.
This sheet contains patchy scoring from one representative experiment, as well as provisional assignment of penetrance of Ste and Pro phenotypes as indicated below in Additional Notes.
Columns A-P	Numbers of worms in each phenotypic class are indicated for 3 genotypes in final rounds of scoring this set.
Column Q	Original location of clone in library
Columns R, S, T	Gene information is based on WormBase WS215 or earlier; see Lists tab for updated gene IDs
Additional Notes:	%patchy =(patchy/(patchy+Fert))*100
	%Ste and %Pro calculated as for %patchy
	Corrected % in each case is % phenotype - % phenotype in the control
	"Ste" in glp-1(e2141) = low magnification scoring as apparent absence of embryos and/or "dark sterile" appearance characteristic of gonads with few or no germ cells
	"Pro" is provisional scoring for the Pro phenotype by DAPI. See results from secondary screen.
	"ng" = the bacteria did not grow
	"other" phenotypes indicated such as Gro, Ste, Lon or sick where they interfered with scoring
	orange font indicates 16 clones that were eliminated from this list because the gene was represented more than once among those identified in the first pass
Tab: Lists 196 and 175
see Methods for discussion of assignment of genes to this set
Gene Information was obtained by submitting the list of WB Gene IDs to WormBase WS versions as indicated

## Sheet: 196 primary 
glp-1(ar202)				rrf-1(pk1417); glp-1(ar202)				glp-1(e2141)				DAPI
Fertile	patchy	% patchy	corrected %patchy	Fertile	patchy	% patchy	corrected %patchy	Fertile	"Ste"	%Ste	corrected %Ste	Fertile	Pro	%Pro	corrected %Pro	HGMP	Gene ID & info (from WB WS215)	Seq name (WB WS215)	WB Gene ID (WB WS215)
16	16	50	40.3226	30	1	3.22581	-5.39488	30	0	0	-2.8436	14	9	39.1304	27.4283	III-1A04	gei-16	T17H7.4	WBGene00001573
8	6	42.8571	19.7802	15	7	31.8182	21.4734	3	12	80	77.973	24	9	27.2727	15.5706	10003 H1	mpk-1 (MAP Kinase), acts in the vulval precursor cells to affect LET-60(Ras)-mediated induction of vulval cell fates, and also affects larval viability, morphology of the male spicules, and germ cell exit from the pachytene stage of first meiotic prophase	F43C1.2	WBGene00003401
2	17	89.4737	62.807	32	8	20	7.09677	6	27	81.8182	68.3047	15	9	37.5	15.8784	10001 B5	rpl-25.2, large ribosomal subunit L23a protein	F52B5.6	WBGene00004439
5	17	77.2727	67.5953	25	4	13.7931	5.17241	1	10	90.9091	88.0655	17	9	34.6154	22.9133	III-5M11	G10 nuclear transcription regulator	C07A9.2	WBGene00007400
3	12	80	70.3226	33	3	8.33333	-0.287356	2	20	90.9091	88.0655	17	5	22.7273	11.0251	III-4H17	rha-2: helicase	C06E1.10	WBGene00015525
0	16	100	83.3333	24	14	36.8421	23.7274	3	16	84.2105	78.6161	3	7	70	58.2979	11062 B10	p-Nitrophenyl phosphatase	C53A3.2	WBGene00016892
2	15	88.2353	71.5686	31	13	29.5455	16.4307	1	24	96	90.4056	21	15	41.6667	29.9645	11024 B2	N-acyl transferase activity	F55A12.8	WBGene00018866
0	22	100	83.3333	23	21	47.7273	34.6125	7	31	81.5789	75.9845	1	10	90.9091	79.207	11003 A8	nol-1 (NucleOLar protein), tRNA and rRNA cytosine-C5-methylase	W07E6.1	WBGene00021073
0	28	100	84.375	6	22	78.5714	66.0714	7	21	75	65.3226	8	11	57.8947	50.5777	I-5K02	eif-3.E (Eukaryotic Initiation Factor)	B0511.10	WBGene00001228
0	20	100	83.3333	14	22	61.1111	47.9964	0	33	100	94.4056	2	2	50	38.2979	11024 B4	hcp-6 (HoloCentric chromosome binding Protein), is required during mitosis for some aspects of mitotic chromosome condensation	Y110A7A.1	WBGene00001833
0	35	100	80.9524	8	26	76.4706	73.2448	45	0	0	0	23	7	23.3333	15.1142	V-5L21	xpo-1 (eXPOrtin, nuclear export receptor), an importin-beta-like protein; function as a nuclear export receptor for proteins containing leucine-rich nuclear export signals; essential for embryogenesis, larval development, normal body morphology and postembryonic growth rates	ZK742.1	WBGene00002078
0	31	100	90.3226	30	1	3.22581	-5.39488	0	22	100	97.1564	13	6	31.5789	19.8768	IV-6A10	inx-9	ZK792.3	WBGene00002131
0	27	100	83.3333	0	47	100	86.8852	4	23	85.1852	79.5908	4	14	77.7778	66.0757	11039 B4	lrs-1 (Leucyl tRNA Synthetase)	R74.1	WBGene00003073
0	25	100	84.375	5	32	86.4865	73.9865	0	25	100	90.3226	2	10	83.3333	76.0163	I-4I17	ngp-1 (Nuclear/nucleolar GTP-binding Protein family)	T19A6.2	WBGene00003596
0	32	100	80.9524	8	18	69.2308	66.005	1	35	97.2222	97.2222	16	6	27.2727	19.0535	II-6G15	nst-1 (mammalian NucleoSTemin (stem cell marker) related), like pro genes	K01C8.9	WBGene00003821
0	14	100	84.375	3	31	91.1765	78.6765	0	30	100	90.3226	3	4	57.1429	49.8258	III-1A12	ptl-1 microtubule-binding protein promote microtubule assembly and stability, and to play a role in maintaining neuronal integrity and axonal transport	F42G9.9	WBGene00004212
0	19	100	84.375	12	16	57.1429	44.6429	0	22	100	90.3226	5	3	37.5	30.1829	X-2F02	rpl-25.1 (Ribosomal Protein, Large subunit)	F55D10.2	WBGene00004438
0	31	100	80.9524	13	14	51.8519	48.626	31	0	0	0	28	8	22.2222	14.003	III-2F13	rrt-1 (aRginyl aa-tRNA syntheTase), affects embryonic viability and fertility	F26F4.10	WBGene00004681
0	30	100	90.3226	17	7	29.1667	20.546	2	23	92	89.1564	7	3	30	18.2979	IV-5O03	Nuclear protein involved in rRNA processing	C47E12.7	WBGene00008151
0	23	100	83.3333	24	13	35.1351	22.0204	0	32	100	94.4056	1	8	88.8889	77.1868	11031 G10	Zinc finger, C2H2 type family protein.	F10B5.3	WBGene00008640
0	18	100	83.3333	1	46	97.8723	84.7576	0	28	100	94.4056	2	9	81.8182	70.1161	11023 C12	RNA polymerase I, second largest subunit	F14B4.3	WBGene00008781
0	30	100	80.9524	3	17	85	81.7742	0	0	Lon	Lon	13	10	43.4783	35.2591	V-9A05	Uncharacterized mammals ortholog, ribosome	F53F4.11	WBGene00009993
0	25	100	80.9524	9	16	64	60.7742	30	0	0	0	3	8	72.7273	64.5081	IV-7E24	WD40 repeat-containing protein; is required for embryonic and larval development; the S cerevisiae homolog is a component of the small-subunit (SSU) processome required for formation of 18S rRNA	Y45F10D.7	WBGene00012887
0	22	100	83.3333	18	18	50	36.8852	0	42	100	94.4056	3	1	25	13.2979	11023 F4	Protein involved in high osmolarity signaling pathway. In Dm involved in RNA metabolic process	Y52B11A.10	WBGene00013129
0	29	100	83.3333	28	7	20	6.88525	3	31	91.1765	85.5821	1	3	75	63.2979	11034 D1	Predicted RNA-binding protein Pno1p interacting with Nob1p	Y53C12B.2	WBGene00013144
0	23	100	84.375	18	11	37.931	25.431	2	29	93.5484	83.871	10	14	58.3333	51.0163	I-3G09	ncbp-1 (Nuclear Cap-Binding Protein)	F37E3.1	WBGene00018156
0	24	100	84.375	2	39	95.122	82.622	0	37	100	90.3226	2	15	88.2353	80.9182	I-2H21	WD40-repeat-containing subunit of the 18S rRNA processing complex	F55F8.3	WBGene00018891
0	20	100	73.3333	4	22	84.6154	71.7122	4	28	87.5	73.9865	10	10	50	28.3784	11009 D12	uncharacterized	R02F2.7	WBGene00019836
0	29	100	84.375	3	27	90	77.5	0	20	100	90.3226	4	22	84.6154	77.2983	V-13B03	GTP-binding protein AARP2 involved in 40S ribosome biogenesis	Y61A9LA.10	WBGene00022021
0	25	100	73.3333	8	19	70.3704	57.4671	0	25	100	86.4865	18	19	51.3514	29.7297	10015 H2	Talin, Transmembrane actin-binding protein involved in membrane cytoskeleton assembly and cell polarization; adaptor protein that links actin to clathrin and endocytosis	Y71G12B.11	WBGene00022151
0	23	100	80.9524	12	18	60	56.7742	27	0	0	0	0	0	other	other	V-9F11	hda-1 (Histone DeAcetylase), maternal and zygotic expression of hda-1 is required for embryonic viability, and zygotic expression of hda-1 is also required for gonadogenesis and vulval development	C53A5.3	WBGene00001834
0	26	100	80.9524	17	9	34.6154	31.3896	0	33	100	100	23	8	25.8065	17.5873	II-7C06	pro-2	C07E3.2	WBGene00007413
0	35	100	90.3226	3	23	88.4615	79.8408	0	11	100	97.1564	9	3	25	13.2979	III-5C07	ATP-dependent RNA helicase	T26G10.1	WBGene00012059
0	20	100	73.3333	5	18	78.2609	65.3576	0	43	100	86.4865	5	20	80	58.3784	11010 A3	ATP-dependent RNA helicase	ZK512.2	WBGene00013983
1	23	95.8333	80.2083	29	9	23.6842	11.1842	1	35	97.2222	87.5448	15	21	58.3333	51.0163	II-4J02	Nucleolar protein-like/EBNA1-binding protein	C18A3.3	WBGene00015941
0	27	100	90.3226	3	18	85.7143	77.0936	1	25	96.1538	93.3102	6	5	45.4545	33.7524	IV-2B21	eIF-1A: Translation initiation factor 1A	H06H21.3	WBGene00019162
0	18	100	73.3333	17	11	39.2857	26.3825	1	25	96.1538	82.6403			ng	ng	11008 C11	Predicted regulator of rRNA gene transcription	K04C2.2	WBGene00019380
0	22	100	73.3333	22	12	35.2941	22.3909	2	21	91.3043	77.7908	9	6	40	18.3784	11003 A12	Involved in rRNA processing	T02H6.1	WBGene00020171
0	21	100	73.3333	4	28	87.5	74.5968	0	31	100	86.4865	7	5	41.6667	20.045	11009 D10	Predicted nucleolar protein involved in ribosome biogenesis	T20B12.3	WBGene00020601
1	32	96.9697	87.2923	20	4	16.6667	8.04598	2	18	90	87.1564	15	5	25	13.2979	III-7M01	Uncharacterized	Y50D7A.9	WBGene00021757
		sick	sick	31	1	3.125	-5.49569	0	30	100	97.1564	10	9	47.3684	35.6663	III-4M21	Adenylate kinase	C29E4.8	WBGene00002879
		Gro	Gro	8	27	77.1429	64.0281	2	24	92.3077	86.7133	1	9	90	78.2979	10114 E10	rps-9 (Ribosomal Protein, Small subunit)	F40F8.10	WBGene00004478
		sick	sick	15	9	37.5	28.8793	0	10	100	97.1564	8	6	42.8571	31.155	III-5L14	DNA replication	Y47D3A.29	WBGene00012936
1	20	95.2381	78.5714	27	9	25	11.8852	30	0	0	-5.59441	27	13	32.5	20.7979	11052 C9	ceh-18 POU-class homeodomain transcription factor; required in hermaphrodites for specific aspects of gonadal sheath cell differentiation,	ZC64.3	WBGene00000441
8	17	68	51.3333	23	8	25.8065	12.6917	22	0	0	-5.59441	4	5	55.5556	43.8534	11027 D10	col-72 (COLlagen), extracellular matrix structural constituent	W09G10.1	WBGene00000648
5	12	70.5882	60.9108	27	5	15.625	7.00431	22	0	0	-2.8436	20	6	23.0769	11.3748	III-6H07	cpf-2: mRNA cleavage	F56A8.6	WBGene00000774
7	11	61.1111	45.4861	19	10	34.4828	21.9828	16	1	5.88235	-3.79507	13	3	18.75	11.4329	X-3D02	dnj-7 (DNaJ domain (prokaryotic heat shock protein)), peripheral membrane proteins of the endoplasmic reticulum (ER) that function in cotranslocational ER protein degradation during ER stress; it may function to regulate ER homeostasis	C55B6.2	WBGene00001025
6	19	76	66.3226	9	6	40	31.3793	22	1	4.34783	1.50422	14	5	26.3158	14.6137	III-6C05	dpy-18: exoskeleton formation	Y47D3B.10	WBGene00001077
0	20	100	83.3333	24	15	38.4615	25.3468	31	4	11.4286	5.83417	3	6	66.6667	54.9645	11081 H4	eft-4 (Elongation FacTor), ranslation elongation factor 1-alpha	R03G5.1	WBGene00001169
4	34	89.4737	79.7963	27	1	3.57143	-5.04926	25	0	0	-2.8436	7	3	30	18.2979	IV-2M22	hoe-1: required for fertility, normal growth progression	E04A4.4	WBGene00001983
3	16	84.2105	57.5439	26	2	7.14286	-5.76037	25	0	0	-13.5135	19	10	34.4828	12.8611	11004 C1	hrp-2 (human HnRNP A1 homolog), Heterogeneous nuclear ribonucleoprotein R involved in mRNA binding	F58D5.1	WBGene00002000
0	20	100	84.375	26	6	18.75	6.25	22	5	18.5185	8.8411	12	5	29.4118	22.0947	X-3G06	hsp-3 encodes a heat shock response 70 (hsp70) protein	C15H9.6	WBGene00002007
2	14	87.5	68.4524	24	0	0	-3.22581	22	0	0	0	27	21	43.75	35.5308	II-6A06	iff-2	F09E5.1	WBGene00002065
1	16	94.1176	77.451	20	16	44.4444	31.3297	24	0	0	-5.59441	1	4	80	68.2979	11203 A3	ins-5 (INSulin related)	ZK84.3	WBGene00002088
10	12	54.5455	44.868	32	6	15.7895	7.16878	32	0	0	-2.8436	20	10	33.3333	21.6312	III-5K06	ins-23	M04D8.3	WBGene00002106
0	14	100	73.3333	29	7	19.4444	6.54122	38	0	0	-13.5135	5	8	61.5385	39.9168	10002 F11	kin-3, catalytic subunit of casein kinase II alpha	B0205.7	WBGene00002191
6	11	64.7059	48.0392	31	14	31.1111	17.9964	36	0	0	-5.59441	2	5	71.4286	59.7264	11036 H6	krs-1 (lysyl (K) tRNA Synthetase)	T02G5.9	WBGene00002238
0	29	100	83.3333	31	13	29.5455	16.4307	9	0	0	-5.59441	18	8	30.7692	19.0671	11071 F11	lin-40 (abnormal cell LINeage), Histone deacetylase complex	T27C4.4	WBGene00003025
13	16	55.1724	45.495	24	4	14.2857	5.66502	30	0	0	-2.8436	17	9	34.6154	22.9133	III-6I07	mif-1: Macrophage migration inhibitory factor	Y56A3A.3	WBGene00003234
2	18	90	74.375	23	5	17.8571	5.35714	23	2	8	-1.67742	11	3	21.4286	14.1115	I-5C19	ncs-2 (Neuronal Calcium Sensor family)	F10G8.5	WBGene00003564
2	14	87.5	64.4231	27	9	25	14.6552	28	0	0	-2.02703	8	3	27.2727	15.5706	X-6I19	nhr-25 (Nuclear Hormone Receptor family)	F11C1.6	WBGene00003623
0	21	100	83.3333	29	9	23.6842	10.5695	27	0	0	-5.59441	18	11	37.931	26.2289	11205 D4	ppp-1 (PyroPhosPhorylase family), Translation initiation factor 2B	C15F1.4	WBGene00004090
11	9	45	35.3226	24	2	7.69231	-0.928382	23	1	4.16667	1.32306	17	7	29.1667	17.4645	III-4P04	rnr-1 DNA replication	T23G5.1	WBGene00004391
0	22	100	80.9524	26	4	13.3333	10.1075	26	0	0	0	27	9	25	16.7808	IV-7I01	rla-2 (Ribosomal protein, Large subunit, Acidic (P1))	Y62E10A.1	WBGene00004410
0	27	100	84.375	19	10	34.4828	21.9828	17	1	5.55556	-4.12186	12	5	29.4118	22.0947	V-13C07	rpl-2	B0250.1	WBGene00004413
8	18	69.2308	59.5533	30	4	11.7647	3.14402	35	1	2.77778	-0.0658241	11	4	26.6667	14.9645	IV-1A14	rpl-15 encodes a large ribosomal subunit L15 protein	K11H12.2	WBGene00004427
6	22	78.5714	68.894	19	6	24	15.3793	31	0	0	-2.8436	7	6	46.1538	34.4517	III-6K04	rsp-3: nuclear phosphoprotein required for constitutive splicing	Y111B2A.18	WBGene00004700
11	18	62.069	52.3915	30	4	11.7647	3.14402	33	0	0	-2.8436	15	9	37.5	25.7979	III-6C01	sbp-1: transcription factor Sterol	Y47D3B.7	WBGene00004735
0	17	100	73.3333	14	12	46.1538	33.2506	32	0	0	-13.5135	11	23	67.6471	46.0254	11006 H11	nduf-2.2 (NADH Ubiquinone oxidoreductase Fe-S protein), involved in mitochondrial electron transport, NADH to ubiquinone (1ary target 11006H11)	T26A5.3	WBGene00006463
2	16	88.8889	79.2115	26	6	18.75	10.1293	19	0	0	-2.8436	5	2	28.5714	16.8693	III-4D10	unc-32, vacuolar	ZK637.8	WBGene00006768
0	17	100	73.3333	32	3	8.57143	-4.3318	22	3	12	-1.51351	6	7	53.8462	32.2245	10114 C2	mdt-22 (MeDiaTor), Surfeit family protein 5, Mediator of RNA polymerase II transcription subunit 22	ZK970.3	WBGene00007022
6	25	80.6452	70.9677	19	8	29.6296	21.0089	26	1	3.7037	0.860102	8	4	33.3333	21.6312	IV-2N13	Uncharacterized	AC8.6	WBGene00007078
8	24	75	65.3226	20	7	25.9259	17.3052	31	0	0	-2.8436	35	1	2.77778	-8.92435	III-6M02	Sterol C5 desaturase	BE10.2	WBGene00007210
14	11	44	34.3226	28	3	9.67742	1.05673	21	2	8.69565	5.85205	11	6	35.2941	23.592	III-5A23	Nion/sugar transporter	C38C10.2	WBGene00008000
2	11	84.6154	67.9487	22	16	42.1053	28.9905	35	0	0	-5.59441	3	5	62.5	50.7979	11059 A7	putatively secreted protein, with an N-terminal EGF-liked domain	F21A3.3	WBGene00008993
8	9	52.9412	36.2745	18	11	37.931	24.8163	23	1	4.16667	-1.42774	3	5	62.5	50.7979	10070 C1	Pseudogene	F22D6.14	WBGene00009055
0	28	100	83.3333	42	10	19.2308	6.11602	24	1	4	-1.59441	10	15	60	48.2979	11072 B3	CAATT-binding transcription factor/60S ribosomal subunit biogenesis protein	F23B12.7	WBGene00009084
0	18	100	83.3333	28	9	24.3243	11.2096	27	1	3.57143	-2.02298	1	6	85.7143	74.0122	11013 G5	uncharacterized	F36A2.7	WBGene00009454
0	26	100	90.3226	17	7	29.1667	20.546	8	0	0	-2.8436	2	12	85.7143	74.0122	IV-6M11	Uncharacterized	F40F11.2	WBGene00009587
3	17	85	58.3333	19	12	38.7097	25.8065	21	3	12.5	-1.01351	19	13	40.625	19.0034	11008 B1	UDP-glucose pyrophosphorylase (metabolism)	K08E3.5	WBGene00010665
0	14	100	73.3333	9	15	62.5	49.5968	34	2	5.55556	-7.95796	9	8	47.0588	25.4372	10021 E10	pdcd-2 - (PDCD (mammalian ProgrammeD Cell Death protein) homolog)	R07E5.10	WBGene00011116
6	17	73.913	47.2464	24	7	22.5806	9.67742	25	1	3.84615	-9.66736	10	13	56.5217	34.9001	10014 B4	sptl-3 (Serine Palmitoyl Transferase famiLy)	T22G5.5	WBGene00011932
4	22	84.6154	74.938	23	3	11.5385	2.91777	32	0	0	-2.8436	7	2	22.2222	10.5201	III-6A03	Uncharacterized w/o othologues	T28D6.3	WBGene00012123
5	21	80.7692	71.0918	24	4	14.2857	5.66502	35	0	0	-2.8436	45	0	0	-11.7021	III-6E01	Amidases	Y41C4A.2	WBGene00012750
2	18	90	80.3226	17	8	32	23.3793	31	0	0	-2.8436	20	12	37.5	25.7979	III-6E18	Ani-1: anillin in cuticle formation	Y49E10.19	WBGene00013038
7	20	74.0741	64.3967	23	12	34.2857	25.665	33	0	0	-2.8436	13	7	35	23.2979	III-6G02	Uncharacterized conserved protein	Y49E10.23	WBGene00013042
10	18	64.2857	47.619	21	7	25	11.8852	34	0	0	-5.59441	3	3	50	38.2979	11047 G1	sta-1 (STAT transcription factor family), required for repressing dauer formation; acts redundantly with some members of the DAF-7/TGF-beta signaling pathway to repress dauer formation; widely expressed during most life stages, including the dauer stage, and is found in the pharynx, intestine, body wall muscles, and in neurons; in some neurons, STA-1 expression appears to be negatively regulated …	Y51H4A.17	WBGene00013111
3	21	87.5	60.8333	25	9	26.4706	13.5674	22	2	8.33333	-5.18018	11	6	35.2941	13.6725	11003 E2	ATP-binding domain 1 family member C	Y75B8A.14	WBGene00013550
11	13	54.1667	44.4892	16	6	27.2727	18.652	22	2	8.33333	5.48973	7	3	30	18.2979	III-6C02	Predicted DNA-binding protein	Y75B8A.32	WBGene00013562
7	14	66.6667	50	23	6	20.6897	7.5749	27	2	6.89655	1.30215	1	5	83.3333	71.6312	11049 A1	Chromatin remodeling protein, contains PHD Zn-finger	Y116A8C.22	WBGene00013799
9	21	70	60.3226	25	8	24.2424	15.6217	26	1	3.7037	0.860102	14	5	26.3158	14.6137	III-6I02	Uncharacterized	Y111B2A.25	WBGene00014613
6	13	68.4211	41.7544	22	13	37.1429	24.2396	33	0	0	-13.5135	19	10	34.4828	12.8611	10014 A8	fatty acid amide hydrolase activity	B0218.2	WBGene00015048
2	21	91.3043	75.6793	34	0	0	-12.5	31	0	0	-9.67742	13	11	45.8333	38.5163	III-3K06	NADH:ubiquinone oxidoreductase	C16A3.5	WBGene00015810
6	11	64.7059	49.0809	20	6	23.0769	10.5769	26	2	7.14286	-2.53456	58	2	3.33333	-3.98374	III-3C06	Uncharacterized	C23G10.5	WBGene00016012
9	10	52.6316	37.0066	20	8	28.5714	16.0714	28	0	0	-9.67742	8	2	20	12.6829	III-1C13	uncharacterized	C29F9.4	WBGene00016219
0	28	100	90.3226	18	4	18.1818	9.56113	41	1	2.38095	-0.46265	5	4	44.4444	32.7423	IV-2O04	cyc-2.1: cytochrome C, required for embryonic development	E04A4.7	WBGene00017121
1	19	95	78.3333	21	12	36.3636	23.2489	31	0	0	-5.59441	21	19	47.5	35.7979	11007 E10	uncharacterized non conserved	F25B5.3	WBGene00017775
0	18	100	83.3333	30	9	23.0769	9.96217	26	0	0	-5.59441	4	7	63.6364	51.9342	11083 A6	uncharacterized (EGF like repeat)	F28B4.3	WBGene00017892
12	17	58.6207	48.9433	30	6	16.6667	8.04598	29	4	12.1212	9.27761	11	5	31.25	19.5479	IV-2K10	Uncharacterized	F29B9.8	WBGene00017923
3	35	92.1053	76.4803	25	14	35.8974	23.3974	20	2	9.09091	-0.58651	20	7	25.9259	18.6089	II-2A12	uncharacterized (1ary target II-2A12)	F52C6.13	WBGene00018670
2	15	88.2353	61.5686	25	8	24.2424	11.3392	32	3	8.57143	-4.94208	8	13	61.9048	40.2831	10036 H6	cri-2 (Conserved Regulator of Innate immunity), Metalloproteinase inhibitor	K07C11.5	WBGene00019478
3	19	86.3636	69.697	32	14	30.4348	17.32	30	1	3.22581	-2.3686	6	5	45.4545	33.7524	11070 B4	Uncharacterized conserved protein	T22H9.1	WBGene00020705
3	17	85	68.3333	30	13	30.2326	17.1178	36	3	7.69231	2.0979	3	8	72.7273	61.0251	11034 F3	structural constituent of ribosome, involved in translation; RNA processing	T25D3.2	WBGene00020796
0	25	100	90.3226	25	3	10.7143	2.0936	28	0	0	-2.8436	10	11	52.381	40.6788	IV-4E14	Zinc finger CCCH domain-containing protein C19orf7 homolog	T26A8.4	WBGene00020827
9	19	67.8571	58.1797	26	2	7.14286	-1.47783	29	1	3.33333	0.489731	10	4	28.5714	16.8693	III-7G15	Uncharacterized	Y22D7AL.1	WBGene00021241
3	15	83.3333	67.7083	26	5	16.129	3.62903	27	0	0	-9.67742	14	3	17.6471	10.33	V-13I08	Uncharacterized	Y46H3C.6	WBGene00021606
7	23	76.6667	66.9892	20	3	13.0435	4.42279	35	1	2.77778	-0.0658241	10	4	28.5714	16.8693	III-7O19	NADH:ubiquinone oxidoreductase	Y53G8AL.2	WBGene00021800
1	22	95.6522	78.9855	49	4	7.54717	-5.56758	32	2	5.88235	0.287947	3	3	50	38.2979	11013 A12	rpb-7 (RNA Polymerase II (B) subunit)	Y54E10BR.6	WBGene00021845
7	17	70.8333	61.1559	22	3	12	3.37931	23	0	0	-2.8436	36	2	5.26316	-6.43897	III-7A05	Uncharacterized	Y82E9BR.6	WBGene00022339
10	3	23.0769	7.45192	35	7	16.6667	4.16667	23	1	4.16667	-5.51075	14	4	22.2222	14.9051	I-2E02	tag-300, subunit B of the cytoplasmic (V1) domain of vacuolar proton-translocating ATPase (V-ATPase), co-ortholog of vha-12 (1ary target I-2E02)	Y110A7A.12	WBGene00022461
0	18	100	73.3333	10	17	62.963	50.0597	32	1	3.0303	-10.4832	11	26	70.2703	48.6486	10051 D11	arf-1.2 (ADP-Ribosylation Factor related) encodes an ADP-ribosylation factor homolog required in vivo for embryonic development	B0336.2	WBGene00000182
0	21	100	83.3333	2	35	94.5946	81.4798	32	0	0	-5.59441	10	5	33.3333	21.6312	11052 G10	cdk-1 , required for cell-cycle progression through M phase in both meiosis and mitosis	T05G5.3	WBGene00000405
0	27	100	90.3226	35	2	5.40541	-3.21528	7	1	12.5	9.6564	11	11	50	38.2979	IV-6A08	inx-8	ZK792.2	WBGene00002130
0	27	100	90.3226	10	9	47.3684	38.7477	25	3	10.7143	7.87068	10	5	33.3333	21.6312	III-4I12	knl-1: cell cycle	C02F5.1	WBGene00002231
0	27	100	84.375	2	30	93.75	81.25	28	0	0	-9.67742	8	8	50	42.6829	II-4J17	phb-2 (mitochondrial ProHiBitin complex), one of two subunits of the mitochondrial prohibitin complex; is required for mitochondrial biogenesis and maintenance and for embryonic, germline, and somatic gonad development	T24H7.1	WBGene00004015
0	19	100	90.3226	24	7	22.5806	13.96	38	0	0	-2.8436	9	12	57.1429	45.4407	III-4E08	plk-1	C14B9.4	WBGene00004042
0	12	100	84.375	16	18	52.9412	40.4412	29	3	9.375	-0.302419	27	6	18.1818	10.8647	I-6G24	pri-2 (DNA PRImase homolog)	W02D9.1	WBGene00004181
0	17	100	84.375	14	11	44	31.5	18	1	5.26316	-4.41426	8	5	38.4615	31.1445	II-1A22	prp-21 (yeast PRP (splicing factor) related)	W07E6.4	WBGene00004188
0	29	100	83.3333	17	13	43.3333	30.2186	24	0	0	-5.59441	1	9	90	78.2979	11301 A2	rpc-1 (RNA Polymerase, Class III (C))	C42D4.8	WBGene00004411
0	11	100	83.3333	26	21	44.6809	31.5661	36	0	0	-5.59441	0	8	100	88.2979	11013 E12	rpl-19 (Ribosomal Protein, Large subunit)	C09D4.5	WBGene00004431
1	16	94.1176	78.4926	29	11	27.5	15	32	3	8.57143	-1.10599	15	7	31.8182	24.5011	I-2G08	spd-5 (SPindle Defective)	F56A3.4	WBGene00004955
0	22	100	83.3333	39	15	27.7778	14.663	19	1	5	-0.594406	19	10	34.4828	22.7806	11053 G6	unc-60 UNC-60A, binds G-actin, depolymerizes actin filaments, and inhibits actin polymerization; is essential during early embryonic development	C38C3.5	WBGene00006794
0	37	100	90.3226	23	9	28.125	19.5043	29	2	6.45161	3.60801	8	7	46.6667	34.9645	IV-2M10	yrs-1: tyrosinyl tRNA synthetase predicted to be mitochondrial	K08F11.4	WBGene00006968
0	17	100	80.9524	25	7	21.875	18.6492	27	0	0	0	24	11	31.4286	23.2094	III-2K21	ctdl-7, Cdc2-related protein kinase	B0285.1	WBGene00007135
0	14	100	73.3333	2	21	91.3043	78.4011	38	2	5	-8.51351	13	6	31.5789	9.95733	10025 G7	Regulator of ribosome synthesis	C15H11.9	WBGene00007617
0	16	100	73.3333	13	17	56.6667	43.7634	30	1	3.22581	-10.2877	9	10	52.6316	31.01	10002 A5	Translocase of outer mitochondrial membrane complex, subunit TOM40	C18E9.6	WBGene00007686
0	21	100	80.9524	17	10	37.037	33.8112	30	0	0	0	33	17	34	25.7808	II-6E20	Translation initiation factor 2B, epsilon subunit	D2085.3	WBGene00008428
0	25	100	80.9524	16	14	46.6667	43.4409	31	0	0	0	17	17	50	41.7808	II-6B21	Ribosome biogenesis protein RPF1	F44G4.1	WBGene00009711
0	18	100	73.3333	0	24	100	87.0968	33	0	0	-13.5135	11	15	57.6923	36.0707	10026 C9	Disrupter of silencing SAS10, involved in rRNA processing	T01B7.5	WBGene00011311
0	22	100	73.3333	12	14	53.8462	40.9429	33	0	0	-13.5135	11	10	47.619	25.9974	10011 A6	RNA-binding nuclear protein (MAK16) containing a distinct C4 Zn-finger	C16A3.6	WBGene00015811
0	17	100	84.375	24	9	27.2727	14.7727	26	0	0	-9.67742	13	3	18.75	11.4329	II-4J09	Predicted RNA-binding protein (RRM superfamily)	C30B5.4	WBGene00016245
1	20	95.2381	85.5607	16	5	23.8095	15.1888	24	1	4	1.1564	16	14	46.6667	34.9645	IV-4M12	Uncharacterized	H23L24.1	WBGene00019228
2	33	94.2857	84.6083	27	5	15.625	7.00431	20	3	13.0435	10.1999	4	9	69.2308	57.5286	IV-2P14	ortholog of Rpp1 (Rpp30), RNA processing	H35B03.2	WBGene00019264
0	24	100	83.3333	20	17	45.9459	32.8312	29	0	0	-5.59441	7	4	36.3636	24.6615	11203 E2	protien kinase activity	M01B12.5	WBGene00019698
0	24	100	80.9524	21	8	27.5862	24.3604	33	0	0	0	33	9	21.4286	13.2094	V-6E01	Mitochondrial/chloroplast ribosomal protein L4	T23B12.2	WBGene00020717
0	25	100	90.3226	26	0	0	-8.62069	21	2	8.69565	5.85205	10	19	65.5172	53.8151	IV-2P13	Cell growth regulatory protein CGR11	W03F8.4	WBGene00020994
0	26	100	84.375	22	11	33.3333	20.8333	27	0	0	-9.67742	8	7	46.6667	39.3496	II-1A18	suppress tumorous growth in the germ line	W07E6.2	WBGene00021074
1	20	95.2381	78.5714	16	15	48.3871	35.2723	38	1	2.5641	-3.0303	9	5	35.7143	24.0122	11023 E9	Nucleolar protein involved in 40S ribosome biogenesis	Y48G1A.4	WBGene00021660
		sick	sick	4	40	90.9091	77.7943	28	1	3.44828	-2.14613	1	4	80	68.2979	11046 E11	cct-8 (Chaperonin Containing TCP-1), required for distal tip cell migration, embryonic and larval viability, fertility, normal body coloration, vulval development and normally rapid growth	Y55F3AR.3	WBGene00021934
0	38	100	84.375	17	18	51.4286	38.9286	26	0	0	-9.67742	13	3	18.75	11.4329	I-2E12	mRNA splicing-RNA synthesis and processing (tRNA, mRNA)	Y110A7A.8	WBGene00022458
0	31	100	84.375	12	28	70	57.5	23	3	11.5385	1.86104	16	7	30.4348	23.1177	II-3F20	Sof1-like rRNA processing protein (contains WD40 repeats)	ZK430.7	WBGene00022742
1	16	94.1176	67.451	27	4	12.9032	0	32	1	3.0303	-10.4832	16	17	51.5152	29.8935	10019 E5	cyb-3, member of the cyclin B family that is required for embryonic viability, and may be involved with sister chromatid segregation.	T06E6.2	WBGene00000868
0	18	100	84.375	23	7	23.3333	10.8333	30	2	6.25	-3.42742	18	4	18.1818	10.8647	I-7D02	xpo-2 (eXPOrtin, nuclear export receptor), required for mitotic progression or apoptosis; may also play a role in vulval morphogenesis	Y48G1A.5	WBGene00002079
0	18	100	73.3333	32	15	31.9149	19.0117	26	0	0	-13.5135	13	12	48	26.3784	10003 D1	npp-17 (Nuclear Pore complex Protein), mRNA export protein	F10G8.3	WBGene00003803
1	17	94.4444	67.7778	31	4	11.4286	-1.47465	28	1	3.44828	-10.0652	13	6	31.5789	9.95733	10011 D5	nud-1, ortholog of the Aspergillus nudC, which mediates nuclear migration	F53A2.4	WBGene00003829
0	19	100	83.3333	21	12	36.3636	23.2489	32	3	8.57143	2.97702	28	9	24.3243	12.6222	11023 D1	prpf-4 (vertebrate Pre-mRNA Processing Factor), protein kinase activity	F22D6.5	WBGene00004186
0	30	100	73.3333	38	9	19.1489	6.24571	37	0	0	-13.5135	11	8	42.1053	20.4836	10001 H3	snr-3, small nuclear ribonucleoprotein, required for biogenesis and function of the snRNPs that catalyze mRNA splicing;affects localization of P granules in embryos, is expressed in embryos and adult gonads	T28D9.10	WBGene00004916
0	19	100	73.3333	29	5	14.7059	1.80266	23	3	11.5385	-1.97505	9	11	55	33.3784	11003 F7	tufm-1 (TU elongation Factor (EF-Tu), Mitochondrial)	Y71H2AM.23	WBGene00007000
0	17	100	80.9524	27	7	20.5882	17.3624	31	0	0	0	38	9	19.1489	10.9298	II-7K16	Mitochondrial 28S ribosomal protein S22	C14A4.14	WBGene00007564
2	29	93.5484	83.871	20	12	37.5	28.8793	28	0	0	-2.8436	16	11	40.7407	29.0386	III-6K13	suppress tumorous growth in the germline, like PRO-1, -2, and -3	Y56A3A.18	WBGene00013236
0	20	100	73.3333	5	21	80.7692	67.866	38	0	0	-13.5135	17	8	32	10.3784	10024 F8	DNA-directed RNA polymerase subunit E'	ZK856.10	WBGene00014111
2	21	91.3043	64.6377	24	9	27.2727	14.3695	20	3	13.0435	-0.470035	15	12	44.4444	22.8228	10003 D2	Hsp90 co-chaperone CNS1 (contains TPR repeats)	C17G10.2	WBGene00015916
0	19	100	83.3333	22	16	42.1053	28.9905	9	0	0	-5.59441	20	10	33.3333	21.6312	11051 H6	RNA helicase	F53H1.1	WBGene00018776
3	42	93.3333	83.6559	24	5	17.2414	8.62069	35	3	7.89474	5.05113	7	12	63.1579	51.4558	III-7A10	Putative SAM-dependent rRNA methyltransferase SPB1	H06I04.3	WBGene00019168
3	22	88	72.375	14	11	44	31.5	23	1	4.16667	-5.51075	26	8	23.5294	16.2123	V-3H05	RNA polymerase I and III	H43I07.2	WBGene00019275
0	22	100	83.3333	23	6	20.6897	7.5749	30	2	6.25	0.655594	4	7	63.6364	51.9342	11022 H5	uncharacterized non conserved	Y110A7A.19	WBGene00022464
		sick	sick	0	14	100	96.7742	30	0	0	0	42	19	31.1475	22.9284	V-7H09	act-1, actin isoform required for proper body wall muscle and pharyngeal muscle structures and the motility of animals; control cytoplasmic microfilament function in the early embryo	T04C12.6	WBGene00000063
		sick	sick	3	31	91.1765	87.9507	35	0	0	0	14	14	50	41.7808	V-9D24	fib-1 (FIBrillarin family)	T01C3.7	WBGene00001423
		sick	sick	22	9	29.0323	16.5323	40	0	0	-9.67742	6	6	50	42.6829	I-3E13	gld-2	ZC308.1	WBGene00001596
		sick	sick	15	4	21.0526	12.4319	21	1	4.54545	1.70185	9	13	59.0909	47.3888	IV-6E17	his-55, H3 histone	F54E12.1	WBGene00001929
		sick	sick	25	2	7.40741	-5.09259	21	0	0	-9.67742	10	3	23.0769	15.7598	II-2A10	let-70, ubiquitin-protein ligase activity; expressed at all stages of development, including dauer; strong staining in most somatic tissues until adult stages, when becomes restricted to the nervous system (1ary target II-2A10).	M7.1	WBGene00002344
		sick	sick	26	1	3.7037	-4.91699	39	0	0	-2.8436	15	7	31.8182	20.1161	III-6B04	mlh-1: DNA mismatch repair	T28A8.7	WBGene00003373
		Ste	Ste	21	11	34.375	31.1492	34	0	0	0	32	13	28.8889	20.6697	II-4G10	pkc-3	F09E5.1	WBGene00004034
		sick	sick	9	23	71.875	61.5302	30	1	3.22581	1.19878	32	15	31.9149	20.2128	10007 D6	rpl-30 (Ribosomal Protein, Large subunit)	Y106G6H.3	WBGene00004444
		sick	sick	24	3	11.1111	2.49042	39	1	2.5	-0.343602	14	13	48.1481	36.446	III-5B12	tbb-1: beta-tubulin	K01G5.7	WBGene00006536
0	10	100	73.3333	17	10	37.037	24.1338	38	0	0	-13.5135	6	10	62.5	40.8784	10026 E11	mfap-1 (MicroFibrillar-Associated Protein homolog)	F43G9.10	WBGene00009671
		sick	sick	25	4	13.7931	5.17241	28	0	0	-2.8436	8	3	27.2727	15.5706	IV-1C11	Cytochrome c oxidase	F29C4.2	WBGene00017926
		sick	sick	25	2	7.40741	-5.09259	21	0	0	-9.67742	10	3	23.0769	15.7598	II-2A10	ubiquitin-protein ligase activity (1ary target II-2A10)	F52C6.12	WBGene00018669
10	2	16.6667	0	17	8	32	18.8852	32	1	3.0303	1.00328	7	3	30	18.2979	III-1C04	daf-7 (abnormal DAuer Formation)	B0412.2	WBGene00000903
0	23	100	90.3226	20	3	13.0435	4.42279	4	14	77.7778	74.9342	7	3	30	18.2979	IV-3J07	cap-1: F-actin capping protein alpha subunit that affects fertility	D2024.6	WBGene00000292
0	22	100	73.3333	13	8	38.0952	25.192	22	14	38.8889	25.3754	13	6	31.5789	9.95733	10009 A11	eif-6 is required for normal rates of growth and control of cell division in the germline; EIF-6 is likely required for ribosome biogenesis	C47B2.5	WBGene00001234
2	24	92.3077	76.6827	31	3	8.82353	-3.67647	12	10	45.4545	35.7771	17	5	22.7273	15.4102	II-8M03	uncharacterized not conserved	Y57A10A.27	WBGene00013267
5	12	70.5882	53.9216	32	11	25.5814	12.4666	9	25	73.5294	67.935	15	6	28.5714	16.8693	11048 B10	Predicted RNA methylase involved in rRNA processing	T07A9.8	WBGene00020296
1	22	95.6522	78.9855	22	13	37.1429	24.0281	21	9	30	24.4056	1	9	90	78.2979	11071 H3	cct-7 (Chaperonin Containing TCP-1), is expressed in most tissues	T10B5.5	WBGene00020391
0	32	100	90.3226	31	4	11.4286	2.80788	21	6	22.2222	19.3786	11	7	38.8889	27.1868	IV-2M02	catalyzes a key step in the tricarboxylic acid (TCA) cycle	T22B11.5	WBGene00020679
3	23	88.4615	78.7841	26	5	16.129	7.50834	21	16	43.2432	40.3996	5	8	61.5385	49.8363	IV-1G20	ATP-dependent RNA helicase DDX1	Y55F3BR.1	WBGene00021938
2	26	92.8571	76.1905	15	17	53.125	40.0102	6	20	76.9231	71.3287	1	8	88.8889	77.1868	11048 F7	H/ACA small nucleolar RNP component GAR1	Y66H1A.4	WBGene00022046
12	5	29.4118	13.7868	27	6	18.1818	5.68182	5	18	78.2609	68.5835	9	4	30.7692	23.4522	X-3G24	uncharacterized	T25B2.3	WBGene00077592
0	26	100	73.3333	8	21	72.4138	59.5106	8	21	72.4138	58.9003	12	8	40	18.3784	10010 A10	eif-3.F	D2013.7	WBGene00001229
0	15	100	84.375	11	15	57.6923	45.1923	6	17	73.913	64.2356	7	2	22.2222	14.9051	V-3N07	mcm-7 (yeast MCM (licensing factor) related), DNA replication licensing factor	F32D1.10	WBGene00003159
0	34	100	84.375	20	9	31.0345	18.5345	15	5	25	15.3226	14	5	26.3158	18.9987	V-12C22	wrs-1, tryptophanyl-tRNA synthetase	Y80D3A.1	WBGene00006945
0	29	100	90.3226	18	10	35.7143	27.0936	10	20	66.6667	63.8231	10	11	52.381	40.6788	IV-6O05	Uncharacterized	F58B3.4	WBGene00010231
0	15	100	84.375	8	19	70.3704	57.8704	18	5	21.7391	12.0617	3	4	57.1429	49.8258	V-10K03	Uncharacterized conserved protein	T06E6.1	WBGene00011538
0	18	100	73.3333	24	10	29.4118	16.5085	9	27	75	61.4865	3	26	89.6552	68.0336	11003 A1	Uncharacterized conserved protein related to ribosomal protein S8E	W09C5.1	WBGene00012351
0	39	100	90.3226	25	6	19.3548	10.7341	15	14	48.2759	45.4323	7	3	30	18.2979	III-7K07	Uncharacterized	Y39A3CR.8	WBGene00021447
0	20	100	84.375	13	10	43.4783	30.9783	11	11	50	40.3226	18	15	45.4545	38.1375	II-3H02	toe-1 (Target Of ERK kinase MPK-1)	ZK430.1	WBGene00022739
0	25	100	73.3333	15	11	42.3077	29.4045	13	22	62.8571	49.3436	30	14	31.8182	10.1966	11003 F9	GTP-binding protein CRFG/NOG1	T07A9.9	WBGene00020297
10	6	37.5	20.8333	16	9	36	36	13	17	56.6667	54.6396	12	5	29.4118	17.7096	IV-1C09	daf-1 - (abnormal DAuer Formation)	F29C4.1	WBGene00000897
7	17	70.8333	61.1559	20	8	28.5714	19.9507	0	0	Gro	Gro	16	12	42.8571	31.155	III-5K11	pri-1: DNA replication	F58A4.4	WBGene00004180
11	7	38.8889	23.2639	22	7	24.1379	11.6379	0	0	Lon	Lon			ng	ng	V-8E17	member of the histidine phosphatase superfamily	C52E4.7	WBGene00008259
5	10	66.6667	40	26	8	23.5294	10.6262	0	0	Gro	Gro	11	12	52.1739	30.5523	10015 F6	Mitochondrial elongation factor	F29C12.4	WBGene00009246
0	12	100	83.3333	2	38	95	81.8852	0	0	Lon	Lon			ng	ng	11003 B10	eif-3.D (Eukaryotic Initiation Factor)	R08D7.3	WBGene00001227
0	18	100	73.3333	23	10	30.303	17.3998	0	0	Gro	Gro	20	12	37.5	15.8784	10021 B4	hsp-60	Y22D7AL.5	WBGene00002025
		sick	sick	1	19	95	91.7742	27	2	6.89655	6.89655	18	16	47.0588	38.8396	V-9D22	rps-16 (Ribosomal Protein, Small subunit) (1ary target V-9D22)	T01C3.6	WBGene00004485
		sick	sick	1	19	95	91.7742	27	2	6.89655	6.89655	18	16	47.0588	38.8396	V-9D22	uncharacterized (1ary target V-9D22)	T01C3.11	WBGene00011325
		sick	sick	8	17	68	59.3793	0	0	Gro	Gro	7	5	41.6667	29.9645	IV-3L07	Uncharacterized	F42C5.10	WBGene00018350

## Sheet: Lists 196 and 175
Set of 196 genes identified in primary screen					Set of 175 genes tested in secondary screen
WormBase Gene ID (WS215)	WormBase Gene ID (WS277)	Public Name	Sequence Name		WormBase Gene ID (WS271)	Public Name	Sequence Name
WBGene00007078	WBGene00007078	AC8.6	AC8.6		WBGene00007078	AC8.6	AC8.6
WBGene00000063	WBGene00000063	act-1	T04C12.6		WBGene00000063	act-1	T04C12.6
WBGene00007210	WBGene00007210	agmo-1	BE10.2		WBGene00007210	agmo-1	BE10.2
WBGene00013038	WBGene00013038	ani-1	Y49E10.19		WBGene00000182	arf-1.2	B0336.2
WBGene00000182	WBGene00000182	arf-1.2	B0336.2		WBGene00013799	athp-3	Y116A8C.22
WBGene00013799	WBGene00013799	athp-3	Y116A8C.22		WBGene00007400	bud-31	C07A9.2
WBGene00007400	WBGene00007400	bud-31	C07A9.2		WBGene00015810	C16A3.5	C16A3.5
WBGene00015810	WBGene00015810	C16A3.5	C16A3.5		WBGene00015811	C16A3.6	C16A3.6
WBGene00015811	WBGene00015811	C16A3.6	C16A3.6		WBGene00015941	C18A3.3	C18A3.3
WBGene00015941	WBGene00015941	C18A3.3	C18A3.3		WBGene00015991	C18H2.4	C18H2.4
WBGene00016012	WBGene00016012	C23G10.5	C23G10.5		WBGene00016012	C23G10.5	C23G10.5
WBGene00008259	WBGene00008259	C52E4.7	C52E4.7		WBGene00000292	cap-1	D2024.6
WBGene00000292	WBGene00000292	cap-1	D2024.6		WBGene00013042	cccp-1	Y49E10.23
WBGene00013042	WBGene00013042	cccp-1	Y49E10.23		WBGene00020391	cct-7	T10B5.5
WBGene00020391	WBGene00020391	cct-7	T10B5.5		WBGene00021934	cct-8	Y55F3AR.3
WBGene00021934	WBGene00021934	cct-8	Y55F3AR.3		WBGene00000405	cdk-1	T05G5.3
WBGene00000405	WBGene00000405	cdk-1	T05G5.3		WBGene00007135	cdk-12	B0285.1
WBGene00007135	WBGene00007135	cdk-12	B0285.1		WBGene00000441	ceh-18	ZC64.3
WBGene00000441	WBGene00000441	ceh-18	ZC64.3		WBGene00000648	col-72	W09G10.1
WBGene00000648	WBGene00000648	col-72	W09G10.1		WBGene00017926	cox-6C	F29C4.2
WBGene00017926	WBGene00017926	cox-6C	F29C4.2		WBGene00019478	cri-2	K07C11.5
WBGene00000774	WBGene00000774	cpf-2	F56A8.6		WBGene00000868	cyb-3	T06E6.2
WBGene00019478	WBGene00019478	cri-2	K07C11.5		WBGene00017121	cyc-2.1	E04A4.7
WBGene00000868	WBGene00000868	cyb-3	T06E6.2		WBGene00000897	daf-1	F29C4.1
WBGene00017121	WBGene00017121	cyc-2.1	E04A4.7		WBGene00000903	daf-7	B0412.2
WBGene00000897	WBGene00000897	daf-1	F29C4.1		WBGene00001025	dnj-7	C55B6.2
WBGene00000903	WBGene00000903	daf-7	B0412.2		WBGene00001168	eef-1A.1	F31E3.5
WBGene00001025	WBGene00001025	dnj-7	C55B6.2		WBGene00019162	eif-1.A	H06H21.3
WBGene00001077	WBGene00001077	dpy-18	Y47D3B.10		WBGene00008428	eif-2Bepsilon	D2085.3
WBGene00001169	WBGene00001169	eef-1A.2	R03G5.1		WBGene00004090	eif-2Bgamma	C15F1.4
WBGene00019162	WBGene00019162	eif-1.A	H06H21.3		WBGene00001228	eif-3.E	B0511.10
WBGene00008428	WBGene00008428	eif-2Bepsilon	D2085.3		WBGene00001229	eif-3.F	D2013.7
WBGene00004090	WBGene00004090	eif-2Bgamma	C15F1.4		WBGene00001234	eif-6	C47B2.5
WBGene00001227	WBGene00001227	eif-3.D	R08D7.3		WBGene00008640	F10B5.3	F10B5.3
WBGene00001228	WBGene00001228	eif-3.E	B0511.10		WBGene00008993	F21A3.3	F21A3.3
WBGene00001229	WBGene00001229	eif-3.F	D2013.7		WBGene00043279	F22D6.8	F22D6.8
WBGene00001234	WBGene00001234	eif-6	C47B2.5		WBGene00009084	F23B12.7	F23B12.7
WBGene00008640	WBGene00008640	F10B5.3	F10B5.3		WBGene00017775	F25B5.3	F25B5.3
WBGene00008993	WBGene00008993	F21A3.3	F21A3.3		WBGene00017892	F28B4.3	F28B4.3
WBGene00009055	WBGene00009055	F22D6.14	F22D6.14		WBGene00009454	F36A2.7	F36A2.7
WBGene00009084	WBGene00009084	F23B12.7	F23B12.7		WBGene00009711	F44G4.1	F44G4.1
WBGene00017775	WBGene00017775	F25B5.3	F25B5.3		WBGene00018669	F52C6.12	F52C6.12
WBGene00017892	WBGene00017892	F28B4.3	F28B4.3		WBGene00018670	F52C6.13	F52C6.13
WBGene00017923	WBGene00017923	F29B9.8	F29B9.8		WBGene00009993	F53F4.11	F53F4.11
WBGene00009454	WBGene00009454	F36A2.7	F36A2.7		WBGene00018776	F53H1.1	F53H1.1
WBGene00009711	WBGene00009711	F44G4.1	F44G4.1		WBGene00018891	F55F8.3	F55F8.3
WBGene00018669	WBGene00018669	F52C6.12	F52C6.12		WBGene00010231	F58B3.4	F58B3.4
WBGene00018670	WBGene00018670	F52C6.13	F52C6.13		WBGene00001423	fib-1	T01C3.7
WBGene00009993	WBGene00009993	F53F4.11	F53F4.11		WBGene00009246	gfm-1	F29C12.4
WBGene00018776	WBGene00018776	F53H1.1	F53H1.1		WBGene00001804	gur-3	ZC504.5
WBGene00018891	WBGene00018891	F55F8.3	F55F8.3		WBGene00019168	H06I04.3	H06I04.3
WBGene00010231	WBGene00010231	F58B3.4	F58B3.4		WBGene00019228	H23L24.1	H23L24.1
WBGene00015048	WBGene00015048	faah-2	B0218.2		WBGene00019264	H35B03.2	H35B03.2
WBGene00012750	WBGene00012750	faah-6	Y41C4A.2		WBGene00001834	hda-1	C53A5.3
WBGene00001423	WBGene00001423	fib-1	T01C3.7		WBGene00001983	hoe-1	E04A4.4
WBGene00009246	WBGene00009246	gfm-1	F29C12.4		WBGene00002000	hrpr-1	F58D5.1
WBGene00001596	WBGene00001596	gld-2	ZC308.1		WBGene00002007	hsp-3	C15H9.6
WBGene00019168	WBGene00019168	H06I04.3	H06I04.3		WBGene00002025	hsp-60	Y22D7AL.5
WBGene00019228	WBGene00019228	H23L24.1	H23L24.1		WBGene00002065	iff-2	F54C9.1
WBGene00019264	WBGene00019264	H35B03.2	H35B03.2		WBGene00002106	ins-23	M04D8.3
WBGene00001833	WBGene00001833	hcp-6	Y110A7A.1		WBGene00002088	ins-5	ZK84.3
WBGene00001834	WBGene00001834	hda-1	C53A5.3		WBGene00002131	inx-9	ZK792.3
WBGene00001929	WBGene00001929	his-55	F54E12.1		WBGene00019301	K02D10.1	K02D10.1
WBGene00001983	WBGene00001983	hoe-1	E04A4.4		WBGene00019380	K04C2.2	K04C2.2
WBGene00002000	WBGene00002000	hrpr-1	F58D5.1		WBGene00010665	K08E3.5	K08E3.5
WBGene00002007	WBGene00002007	hsp-3	C15H9.6		WBGene00019658	K11H12.1	K11H12.1
WBGene00002025	WBGene00002025	hsp-60	Y22D7AL.5		WBGene00002238	kars-1	T02G5.9
WBGene00002065	WBGene00002065	iff-2	F54C9.1		WBGene00002191	kin-3	B0205.7
WBGene00018350	WBGene00018350	ifo-1	F42C5.10		WBGene00002231	knl-1	C02F5.1
WBGene00002106	WBGene00002106	ins-23	M04D8.3		WBGene00002247	lam-1	W03F8.5
WBGene00002088	WBGene00002088	ins-5	ZK84.3		WBGene00003073	lars-1	R74.1
WBGene00002130	WBGene00002130	inx-8	ZK792.2		WBGene00002879	let-754	C29E4.8
WBGene00002131	WBGene00002131	inx-9	ZK792.3		WBGene00003025	lin-40	T27C4.4
WBGene00019380	WBGene00019380	K04C2.2	K04C2.2		WBGene00003159	mcm-7	F32D1.10
WBGene00010665	WBGene00010665	K08E3.5	K08E3.5		WBGene00007022	mdt-22	ZK970.3
WBGene00002238	WBGene00002238	kars-1	T02G5.9		WBGene00009671	mfap-1	F43G9.10
WBGene00002191	WBGene00002191	kin-3	B0205.7		WBGene00009587	mig-38	F40F11.2
WBGene00002231	WBGene00002231	knl-1	C02F5.1		WBGene00003373	mlh-1	T28A8.7
WBGene00003073	WBGene00003073	lars-1	R74.1		WBGene00003401	mpk-1	F43C1.2
WBGene00002344	WBGene00002344	let-70	M7.1		WBGene00020796	mrpl-28	T25D3.2
WBGene00002879	WBGene00002879	let-754	C29E4.8		WBGene00020717	mrpl-4	T23B12.2
WBGene00003025	WBGene00003025	lin-40	T27C4.4		WBGene00007564	mrps-22	C14A4.14
WBGene00003159	WBGene00003159	mcm-7	F32D1.10		WBGene00018866	nath-10	F55A12.8
WBGene00007022	WBGene00007022	mdt-22	ZK970.3		WBGene00018156	ncbp-1	F37E3.1
WBGene00009671	WBGene00009671	mfap-1	F43G9.10		WBGene00003564	ncs-2	F10G8.5
WBGene00003234	WBGene00003234	mif-1	Y56A3A.3		WBGene00021800	nduf-9	Y53G8AL.2
WBGene00009587	WBGene00009587	mig-38	F40F11.2		WBGene00003596	ngp-1	T19A6.2
WBGene00003373	WBGene00003373	mlh-1	T28A8.7		WBGene00020297	nog-1	T07A9.9
WBGene00003401	WBGene00003401	mpk-1	F43C1.2		WBGene00021660	nol-14	Y48G1A.4
WBGene00020796	WBGene00020796	mrpl-28	T25D3.2		WBGene00021073	nol-2	W07E6.1
WBGene00020717	WBGene00020717	mrpl-4	T23B12.2		WBGene00003821	nst-1	K01C8.9
WBGene00007564	WBGene00007564	mrps-22	C14A4.14		WBGene00003829	nud-1	F53A2.4
WBGene00018866	WBGene00018866	nath-10	F55A12.8		WBGene00020679	ogdh-1	T22B11.5
WBGene00018156	WBGene00018156	ncbp-1	F37E3.1		WBGene00016219	pals-24	C29F9.4
WBGene00003564	WBGene00003564	ncs-2	F10G8.5		WBGene00003936	pat-12	T17H7.4
WBGene00006463	WBGene00006463	nduf-2.2	T26A5.3		WBGene00011116	pdcd-2	R07E5.10
WBGene00021800	WBGene00021800	nduf-9	Y53G8AL.2		WBGene00016892	pgph-3	C53A3.2
WBGene00003596	WBGene00003596	ngp-1	T19A6.2		WBGene00004015	phb-2	T24H7.1
WBGene00003623	WBGene00003623	nhr-25	F11C1.6		WBGene00004027	pie-1	Y49E10.14
WBGene00020297	WBGene00020297	nog-1	T07A9.9		WBGene00004034	pkc-3	F09E5.1
WBGene00021660	WBGene00021660	nol-14	Y48G1A.4		WBGene00004042	plk-1	C14B9.4
WBGene00021073	WBGene00021073	nol-2	W07E6.1		WBGene00013144	pno-1	Y53C12B.2
WBGene00003821	WBGene00003821	nst-1	K01C8.9		WBGene00012936	pola-1	Y47D3A.29
WBGene00003829	WBGene00003829	nud-1	F53A2.4		WBGene00004181	pri-2	W02D9.1
WBGene00020679	WBGene00020679	ogdh-1	T22B11.5		WBGene00007413	pro-2	C07E3.2
WBGene00016219	WBGene00016219	pals-24	C29F9.4		WBGene00004188	prp-21	W07E6.4
WBGene00011116	WBGene00011116	pdcd-2	R07E5.10		WBGene00022458	prp-31	Y110A7A.8
WBGene00016892	WBGene00016892	pgph-3	C53A3.2		WBGene00004186	prpf-4	F22D6.5
WBGene00004015	WBGene00004015	phb-2	T24H7.1		WBGene00004212	ptl-1	F42G9.9
WBGene00004034	WBGene00004034	pkc-3	F09E5.1		WBGene00019836	R02F2.7	R02F2.7
WBGene00004042	WBGene00004042	plk-1	C14B9.4		WBGene00003803	rae-1	F10G8.3
WBGene00013144	WBGene00013144	pno-1	Y53C12B.2		WBGene00004679	rars-1	F26F4.10
WBGene00012936	WBGene00012936	pola-1	Y47D3A.29		WBGene00016245	rbmx-2	C30B5.4
WBGene00004180	WBGene00004180	pri-1	F58A4.4		WBGene00015525	rha-2	C06E1.10
WBGene00004181	WBGene00004181	pri-2	W02D9.1		WBGene00019698	riok-1	M01B12.5
WBGene00007413	WBGene00007413	pro-2	C07E3.2		WBGene00004410	rla-2	Y62E10A.1
WBGene00004188	WBGene00004188	prp-21	W07E6.4		WBGene00019275	rpac-40	H43I07.2
WBGene00022458	WBGene00022458	prp-31	Y110A7A.8		WBGene00021845	rpb-7	Y54E10BR.6
WBGene00004186	WBGene00004186	prpf-4	F22D6.5		WBGene00004411	rpc-1	C42D4.8
WBGene00004212	WBGene00004212	ptl-1	F42G9.9		WBGene00014111	rpc-25	ZK856.10
WBGene00019836	WBGene00019836	R02F2.7	R02F2.7		WBGene00004431	rpl-19	C09D4.5
WBGene00003803	WBGene00003803	rae-1	F10G8.3		WBGene00004413	rpl-2	B0250.1
WBGene00016245	WBGene00016245	rbmx-2	C30B5.4		WBGene00004438	rpl-25.1	F55D10.2
WBGene00015525	WBGene00015525	rha-2	C06E1.10		WBGene00004439	rpl-25.2	F52B5.6
WBGene00019698	WBGene00019698	riok-1	M01B12.5		WBGene00004444	rpl-30	Y106G6H.3
WBGene00004410	WBGene00004410	rla-2	Y62E10A.1		WBGene00008781	rpoa-2	F14B4.3
WBGene00004391	WBGene00004391	rnr-1	T23G5.1		WBGene00004485	rps-16	T01C3.6
WBGene00019275	WBGene00019275	rpac-40	H43I07.2		WBGene00004490	rps-21	F37C12.11
WBGene00021845	WBGene00021845	rpb-7	Y54E10BR.6		WBGene00004478	rps-9	F40F8.10
WBGene00004411	WBGene00004411	rpc-1	C42D4.8		WBGene00007617	rrbs-1	C15H11.9
WBGene00014111	WBGene00014111	rpc-25	ZK856.10		WBGene00008151	rrp-1	C47E12.7
WBGene00004427	WBGene00004427	rpl-15	K11H12.2		WBGene00020296	rrp-8	T07A9.8
WBGene00004431	WBGene00004431	rpl-19	C09D4.5		WBGene00004700	rsp-3	Y111B2A.18
WBGene00004413	WBGene00004413	rpl-2	B0250.1		WBGene00008000	slc-17.2	C38C10.2
WBGene00004438	WBGene00004438	rpl-25.1	F55D10.2		WBGene00004916	snr-3	T28D9.10
WBGene00004439	WBGene00004439	rpl-25.2	F52B5.6		WBGene00004955	spd-5	F56A3.4
WBGene00004444	WBGene00004444	rpl-30	Y106G6H.3		WBGene00004959	spe-5	Y110A7A.12
WBGene00008781	WBGene00008781	rpoa-2	F14B4.3		WBGene00011932	sptl-3	T22G5.5
WBGene00004485	WBGene00004485	rps-16	T01C3.6		WBGene00013111	sta-1	Y51H4A.17
WBGene00004478	WBGene00004478	rps-9	F40F8.10		WBGene00011311	T01B7.5	T01B7.5
WBGene00007617	WBGene00007617	rrbs-1	C15H11.9		WBGene00011538	T06E6.1	T06E6.1
WBGene00008151	WBGene00008151	rrp-1	C47E12.7		WBGene00011758	T13H5.4	T13H5.4
WBGene00020296	WBGene00020296	rrp-8	T07A9.8		WBGene00020601	T20B12.3	T20B12.3
WBGene00004681	WBGene00004681	rsd-2	F52G2.2		WBGene00020705	T22H9.1	T22H9.1
WBGene00004700	WBGene00004700	rsp-3	Y111B2A.18		WBGene00077592	T25B2.3	T25B2.3
WBGene00004735	WBGene00004735	sbp-1	Y47D3B.7		WBGene00020827	T26A8.4	T26A8.4
WBGene00008000	WBGene00008000	slc-17.2	C38C10.2		WBGene00012059	T26G10.1	T26G10.1
WBGene00004916	WBGene00004916	snr-3	T28D9.10		WBGene00012123	T28D6.3	T28D6.3
WBGene00004955	WBGene00004955	spd-5	F56A3.4		WBGene00006536	tbb-1	K01G5.7
WBGene00011932	WBGene00011932	sptl-3	T22G5.5		WBGene00006771	tln-1	Y71G12B.11
WBGene00013111	WBGene00013111	sta-1	Y51H4A.17		WBGene00022739	toe-1	ZK430.1
WBGene00011311	WBGene00011311	T01B7.5	T01B7.5		WBGene00007686	tomm-40	C18E9.6
WBGene00011325	WBGene00011325	T01C3.11	T01C3.11		WBGene00015916	ttc-4	C17G10.2
WBGene00020171	WBGene00020171	T02H6.1	T02H6.1		WBGene00007000	tufm-1	Y71H2AM.23
WBGene00011538	WBGene00011538	T06E6.1	T06E6.1		WBGene00006768	unc-32	ZK637.8
WBGene00020601	WBGene00020601	T20B12.3	T20B12.3		WBGene00006794	unc-60	C38C3.5
WBGene00020705	WBGene00020705	T22H9.1	T22H9.1		WBGene00021074	W07E6.2	W07E6.2
WBGene00077592	WBGene00077592	T25B2.3	T25B2.3		WBGene00012351	W09C5.1	W09C5.1
WBGene00020827	WBGene00020827	T26A8.4	T26A8.4		WBGene00006945	wars-1	Y80D3A.1
WBGene00012059	WBGene00012059	T26G10.1	T26G10.1		WBGene00002078	xpo-1	ZK742.1
WBGene00012123	WBGene00012123	T28D6.3	T28D6.3		WBGene00002079	xpo-2	Y48G1A.5
WBGene00021757	WBGene00021757	taco-1	Y50D7A.9		WBGene00012711	Y39E4A.1	Y39E4A.1
WBGene00006536	WBGene00006536	tbb-1	K01G5.7		WBGene00012887	Y45F10D.7	Y45F10D.7
WBGene00022739	WBGene00022739	toe-1	ZK430.1		WBGene00021606	Y46H3C.6	Y46H3C.6
WBGene00007686	WBGene00007686	tomm-40	C18E9.6		WBGene00013129	Y52B11A.10	Y52B11A.10
WBGene00015916	WBGene00015916	ttc-4	C17G10.2		WBGene00013236	Y56A3A.18	Y56A3A.18
WBGene00007000	WBGene00007000	tufm-1	Y71H2AM.23		WBGene00013267	Y57A10A.27	Y57A10A.27
WBGene00006768	WBGene00006768	unc-32	ZK637.8		WBGene00022021	Y61A9LA.10	Y61A9LA.10
WBGene00006794	WBGene00006794	unc-60	C38C3.5		WBGene00022046	Y66H1A.4	Y66H1A.4
WBGene00020994	WBGene00020994	W03F8.4	W03F8.4		WBGene00013550	Y75B8A.14	Y75B8A.14
WBGene00021074	WBGene00021074	W07E6.2	W07E6.2		WBGene00013562	Y75B8A.32	Y75B8A.32
WBGene00012351	WBGene00012351	W09C5.1	W09C5.1		WBGene00022339	Y82E9BR.6	Y82E9BR.6
WBGene00006945	WBGene00006945	wars-1	Y80D3A.1		WBGene00006968	yars-2	K08F11.4
WBGene00002078	WBGene00002078	xpo-1	ZK742.1		WBGene00022742	ZK430.7	ZK430.7
WBGene00002079	WBGene00002079	xpo-2	Y48G1A.5		WBGene00013983	ZK512.2	ZK512.2
WBGene00014613	WBGene00014613	Y111B2A.25	Y111B2A.25
WBGene00021241	WBGene00021241	Y22D7AL.1	Y22D7AL.1
WBGene00012887	WBGene00012887	Y45F10D.7	Y45F10D.7
WBGene00021606	WBGene00021606	Y46H3C.6	Y46H3C.6
WBGene00013129	WBGene00013129	Y52B11A.10	Y52B11A.10
WBGene00021938	WBGene00021938	Y55F3BR.1	Y55F3BR.1
WBGene00013236	WBGene00013236	Y56A3A.18	Y56A3A.18
WBGene00013267	WBGene00013267	Y57A10A.27	Y57A10A.27
WBGene00022021	WBGene00022021	Y61A9LA.10	Y61A9LA.10
WBGene00022046	WBGene00022046	Y66H1A.4	Y66H1A.4
WBGene00013550	WBGene00013550	Y75B8A.14	Y75B8A.14
WBGene00013562	WBGene00013562	Y75B8A.32	Y75B8A.32
WBGene00022339	WBGene00022339	Y82E9BR.6	Y82E9BR.6
WBGene00006968	WBGene00006968	yars-2	K08F11.4
WBGene00022742	WBGene00022742	ZK430.7	ZK430.7
WBGene00013983	WBGene00013983	ZK512.2	ZK512.2
WBGene00022151	not found
WBGene00021447	not found
WBGene00022464	not found
WBGene00001573	not found
WBGene00022461	not found
